# Supplementary material
Source: Springer Nature journal article supplement (https://www.springermedizin.de/resource/supplementary/12958_2011_955_MOESM3_ESM.pdf/9566450)

**IFNT mRNA  
(Fold effect)**

**BMP2**

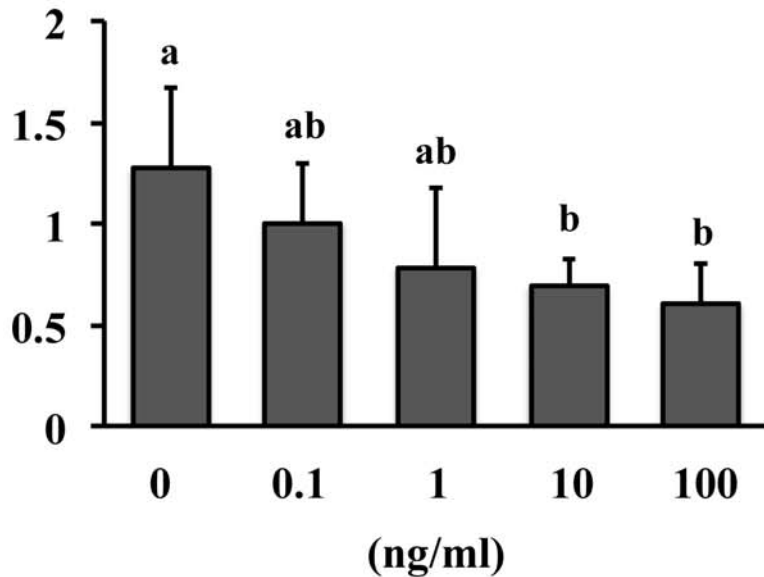

**BMP4**

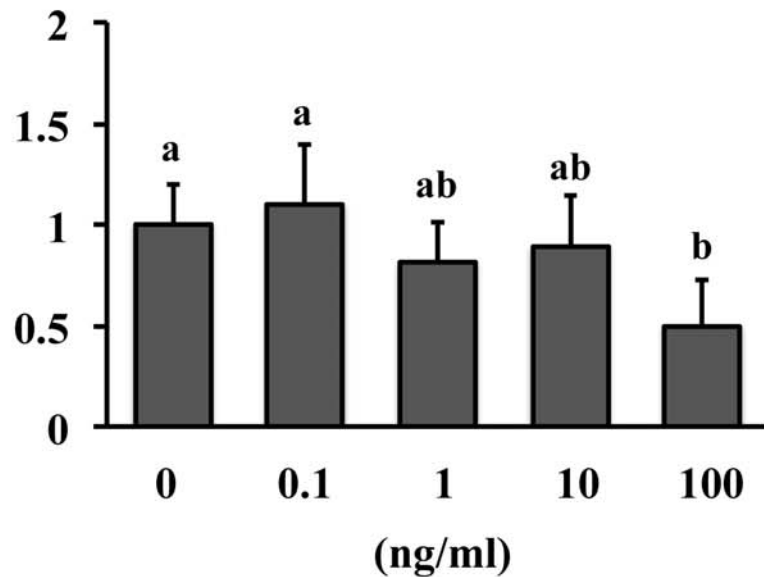

Supplement: MOESM3 [file 9566450]
